# Supplementary material
Source: PubMed Central journal article supplement (PMC3443148)
Supplement: 1203179109_pnas.201203179SI.pdf [file 1203179109_pnas.201203179SI.pdf]

# Supporting Information

Riedl et al. 10.1073/pnas.1203179109

## SI Materials and Methods

**Subjects.** Details on the subjects, namely their ages, sex, and rearing histories are provided (Table S7). The numbers of groups tested based on kinship with the victim and dominance to the thief are shown in Table S8. Table S9 provides details on the 60 test groups.

**Test groups.** Sixty test groups were created based on dominance relationships between actor and thief and kinship relationships between actor and victim.

## SI Results and Discussion

Following are details on the generalized linear mixed model (GLMM) results that were presented in the article (Tables S1–S5).

**Whole Sample: Simplifying the Model.** For the whole sample of 60 test groups, there was an initial full model consisting of four types of variables. The response variable; three random effects factors: actor, thief, and victim; test variables that defined the experimental design: condition, dominance, and kinship; and control variables: actor's age, sex, rearing history (nursery vs. mother-reared), session order, and trial order per session.

Full model: response  $\sim$  condition + dominance + kinship + age + sex + rearing + session order + trial order within session + actor + thief + victim.

The coefficients were estimated by using maximum likelihood, and we used a binomial error structure and logit link function. A likelihood ratio test (using the ANOVA function in R) was used to measure the change of the fit between the full model and a reduced model (not comprising the factor of interest). A significant finding indicated that the factor in question contributed to the variance of the response variable “collapsing the trapdoor.”

To guard against false-positives (1), we tested whether the whole set of test variables defining the experimental design significantly explained variance in the response variable by testing the full model against the null model (which did not comprise any of the test factors but included the control predictors). This comparison revealed significance ( $\chi^2_7 = 26.927$ ,  $P < 0.001$ ), which supports the interpretation that the tested factors influenced the response of the actors.

We investigated the potential interaction effects of condition, dominance, and kinship using only the third-party (3P) unfair and 3P theft conditions because these were the only conditions in which both thieves and victims were present. We analyzed the interactions by including them in the original full model. Neither the interactions between condition\*dominance nor dominance\*kinship were significant (Table S2). Note that the interaction term condition\*kinship could not be computed because of low response rates in some conditions in interaction with kinship. A comparison between the full model and the null model showed a trend:  $\chi^2_5 = 10.139$ ,  $P = 0.07139$ .

Instead of using dominance and kinship (and their interaction) as predictor variables, we also tested the effect of these variables by using the single predictor variable “test group,” which consisted of the four categories shown in Table S8 combined into a single factor. A comparison between the full model and the null model (only consisting of control variables) revealed significance:  $\chi^2_8 = 26.452$ ,  $P = 0.00087$ . The factor group category did not significantly explain variance on the response variable ( $\chi^2_3 = 6.4155$ ,  $P = 0.093$ ).

**Analysis of Test Conditions.** From Table S1, it can be seen that only the random-effects factor “actor,” the control factor “session

order,” and the experimental test variables “condition” and “dominance” contribute to the variance of the response variable “collapsing the trapdoor.” The single effects on the response of each significant control and experimental test factor in the final model are shown in Table S3. Because the test factor “condition” was significant ( $\chi^2_5 = 19.508$ ,  $P = 0.002$ ), post hoc pairwise comparisons between different conditions were performed. We ran the final model twice to use both the second- and the third-party theft condition (2P theft, 3P theft) as reference conditions to show differences between the theft conditions and every other condition.

Final model: response  $\sim$  condition + dominance + session order + actor

**Dominant Actors.** Both, the experimental test variable “condition” and the control variable “session order” were significant predictors (condition:  $\chi^2_5 = 17.252$ ,  $P = 0.004$ ; session order:  $\chi^2_1 = 7.8767$ ,  $P = 0.005$ ). All pairwise comparisons between conditions are displayed in Table S4. We ran the final model twice to use both the second- and the third-party theft condition (2P theft, 3P theft) as reference conditions to display differences between the theft conditions and every other condition.

Model: response  $\sim$  condition + dominance + session order + actor

**Subordinate Actors.** Both the experimental test variable “condition” and the control variable “session order” were significant predictors (condition:  $\chi^2_5 = 16.223$ ,  $P = 0.006$ ; session order:  $\chi^2_1 = 3.9659$ ,  $P = 0.046$ ). All pairwise comparisons between conditions are displayed in Table S5. We ran the final model twice to use both, the second- and the third-party theft condition (2P theft, 3P theft) as reference conditions to display differences between the theft conditions and every other condition.

Model: response  $\sim$  condition + dominance + session order + actor

**Nonparametric Analyses.** Because mixed models are still under development and their estimates a matter of debate (2), we also analyzed the data with Friedman's and Wilcoxon's exact-signed rank tests. All analyses are two-tailed. The results of these analyses support those presented in the article.

Responses of subjects in all groups did not differ across conditions (Friedman's  $\chi^2_5$  test = 9.700,  $P = 0.084$ ). Given that there was a trend, we did pairwise comparisons between the conditions. There was no difference between 2P theft and 2P loss [Wilcoxon T<sup>+</sup> test = 23.00,  $n = 13$  (five ties),  $P = 0.570$ ], 2P theft and 3P theft [Wilcoxon T<sup>+</sup> test = 41.5,  $n = 13$  (two ties),  $P = 0.473$ ], 3P theft and 3P loss [Wilcoxon T<sup>+</sup> test = 10.00,  $n = 13$  (six ties),  $P = 0.563$ ], and 3P theft and 3P no victim [Wilcoxon T<sup>+</sup> test = 1.00,  $n = 13$  (eight ties),  $P = 0.125$ ]. There was a trend between 3P theft and 3P unfair [Wilcoxon T<sup>+</sup> test = 2.00,  $n = 13$  (six ties),  $P = 0.063$ ], but there was no a priori reason to expect this difference which might arise because of multiple comparisons.

Responses of dominant subjects differed across conditions (Friedman's  $\chi^2_5$  test = 13.059,  $P = 0.017$ ). Importantly, there was a strong trend for dominants to collapse the platform more often in 2P theft than 2P loss [Wilcoxon T<sup>+</sup> test = 15.00,  $n = 12$  (seven ties),  $P = 0.062$ ], consistent with previous findings (3). There was a weak tendency for dominants to collapse the trapdoor more often in 2P theft than 3P theft [Wilcoxon T<sup>+</sup> test = 30.00,  $n = 12$  (four ties),  $P = 0.102$ ]. In contrast, dominant individuals did not engage in third-party punishment by collapsing the plat-

form more often in response to 3P theft [3P theft vs. 3P loss: Wilcoxon  $T^+$  test = 6.00,  $n = 12$  (seven ties),  $P = 0.813$ ; 3P theft vs. 3P unfair: Wilcoxon  $T^+$  test = 3.50,  $n = 12$  (six ties),  $P = 0.188$ ; 3P theft vs. 3P no victim: Wilcoxon  $T^+$  test = 3.00,  $n = 12$  (seven ties),  $P = 0.313$ ]. As with the GLMM data, nonparametric tests also showed that subordinates did not collapse the platform in response to the different conditions [Friedman's  $\chi^2_5$  test = 7.090,  $P = 0.217$ ; 2P theft vs. 2P loss: Wilcoxon  $T^+$  test = 3.50,  $n = 11$  (six ties),  $P = 0.375$ ; 2P theft vs. 3P theft: Wilcoxon  $T^+$  test = 4.00,  $n = 11$  (seven ties),  $P = 1.000$ ; 3P theft vs. 3P unfair: Wilcoxon  $T^+$  test = 0,  $n = 11$  (10 ties),  $P = 1.000$ ; 3P theft vs. 3P loss: Wilcoxon  $T^+$  test = 2.00,  $n = 11$  (nine ties),  $P =$

1.000; 3P theft vs. 3P no victim: Wilcoxon  $T^+$  test = 1.00,  $n = 11$  (eight ties),  $P = 0.500$ ].

**Individual Differences.** Because a few individuals are theoretically able to maintain cooperation in a group by punishing non-cooperators (4), we examined the response rates of each individual. However, because all subjects participated in four groups of differing composition, it was not practical to analyze the data statistically. Table S6 presents the data for each binary response (collapse or not collapse) for each individual and condition. There does not appear to be any individually consistent pattern of punishing third-party theft.

- Forstmeier W, Schielzeth H (2011) Cryptic multiple hypotheses testing in linear models: Overestimated effect sizes and the winner's curse. *Behav Ecol Sociobiol* 65: 47–55.
- Bolker BM, et al. (2009) Generalized linear mixed models: A practical guide for ecology and evolution. *Trends Ecol Evol* 24:127–135.

- Jensen K, Call J, Tomasello M (2007) Chimpanzees are vengeful but not spiteful. *Proc Natl Acad Sci USA* 104:13046–13050.
- O'Gorman R, Henrich J, Van Vugt M (2009) Constraining free riding in public goods games: Designated solitary punishers can sustain human cooperation. *Proc Biol Sci* 276: 323–329.

**Table S1. Results of the likelihood ratio tests of full model vs. reduced model comparisons**

| Factors included in the full model | Likelihood ratio tests |           |                |
|------------------------------------|------------------------|-----------|----------------|
|                                    | $\chi^2$               | <i>df</i> | <i>P</i> value |
| Random effects factors             |                        |           |                |
| Actor                              | 12.584                 | 1         | 0.0003*        |
| Thief                              | 0                      | 1         | 1.0000         |
| Victim                             | 0.2747                 | 1         | 0.6002         |
| Control factors                    |                        |           |                |
| Session order effect               | 11.549                 | 1         | 0.0007*        |
| Trial order per session            | 0.3254                 | 1         | 0.5684         |
| Actor's age                        | 2.7012                 | 1         | 0.1003         |
| Actor's sex                        | 0.1619                 | 1         | 0.6874         |
| Actor's rearing history            | 1.4087                 | 1         | 0.2353         |
| Test factors                       |                        |           |                |
| Condition                          | 19.508                 | 5         | 0.0015*        |
| Dominance of actor to thief        | 8.6729                 | 1         | 0.0032*        |
| Kinship of actor to victim         | 0.1476                 | 1         | 0.7008         |

The sample comprises all actors ( $n = 13$ ) and all test groups ( $n = 60$ ). The full model was always compared with the reduced model not including the factor of interest. The table shows the  $\chi^2$ , *df*, and *P* values of model comparison for each factor.

\*Indicates a significant effect.

**Table S2. Results of the likelihood ratio tests of model comparisons of the sample of all actors ( $n = 13$ ) and all test groups ( $n = 60$ ) in the 3P theft and 3P unfair condition**

| Factors included in the full model     | Likelihood ratio tests |           |                |
|----------------------------------------|------------------------|-----------|----------------|
|                                        | $\chi^2$               | <i>df</i> | <i>P</i> value |
| Random effects factors                 |                        |           |                |
| Actor                                  | 6.3079                 | 1         | 0.0120         |
| Thief                                  | 0                      | 1         | 1.0000         |
| Victim                                 | 0                      | 1         | 1.0000         |
| Control factors                        |                        |           |                |
| Session order effect                   | 5.7068                 | 1         | 0.0169*        |
| Trial order per session                | 0.1261                 | 1         | 0.7225         |
| Actor's age                            | 2.3232                 | 1         | 0.1275         |
| Actor's sex                            | 0.3401                 | 1         | 0.5598         |
| Actor's rearing history                | 1.0868                 | 1         | 0.2972         |
| Test factors                           |                        |           |                |
| Condition                              | 4.9506                 | 2         | 0.08414'       |
| Dominance of actor to thief            | 4.7679                 | 3         | 0.1896         |
| Kinship of actor to victim             | 2.4791                 | 2         | 0.2895         |
| Interaction of condition and dominance | 0.1667                 | 1         | 0.6831         |
| Interaction of dominance and kinship   | 1.3138                 | 1         | 0.2517         |

The full model was always compared with the reduced model not including the factor of interest. The table shows the  $\chi^2$ , *df*, and *P* values of model comparison for each factor.

\*Indicates a significant effect.

**Table S3. Results of the final GLMM for all actors (13 actors, 60 groups)**

| Factor                  | Estimate | SE     | Z      | <i>P</i> |
|-------------------------|----------|--------|--------|----------|
| Dominance               | 0.6406   | 0.2221 | 2.884  | 0.0039*  |
| Session order           | -0.5875  | 0.1805 | -3.254 | 0.0011*  |
| Condition               |          |        |        |          |
| 2P theft as reference   |          |        |        |          |
| 2P theft – 2P loss      | -0.5277  | 0.4989 | -1.058 | 0.2902   |
| 2P theft – 3P theft     | -0.7766  | 0.5174 | -1.501 | 0.1334   |
| 2P theft – 3P loss      | -0.5222  | 0.4976 | -1.049 | 0.2939   |
| 2P theft – 3P unfair    | -2.1749  | 0.6613 | -3.289 | 0.0010*  |
| 2P theft – 3P no-victim | -1.9415  | 0.6232 | -3.116 | 0.0018*  |
| 3P theft as reference   |          |        |        |          |
| 3P theft – 2P loss      | 0.2489   | 0.5313 | 0.468  | 0.6395   |
| 3P theft – 2P theft     | 0.7766   | 0.5174 | 1.501  | 0.1334   |
| 3P theft – 3P loss      | 0.2544   | 0.5300 | 0.480  | 0.6312   |
| 3P theft – 3P unfair    | -1.3983  | 0.6813 | -2.052 | 0.0401*  |
| 3P theft – 3P no-victim | -1.1649  | 0.6440 | -1.809 | 0.0705   |

The estimates display the regression weight of the factor on the response variable; SE is the SE of the estimate; the Z and *P* values are also given. The 2P theft and 3P theft were the reference conditions.

\*Indicates a significant effect.



**Table S6. Raw response data for each actor according to their rank relative to the thief**

| Actor    | No. of groups | 2P theft |      | 2P loss |     | 3P theft |      | 3P loss |     | 3P unfair |     | 3P no-victim |     |
|----------|---------------|----------|------|---------|-----|----------|------|---------|-----|-----------|-----|--------------|-----|
|          |               | Dom      | Sub  | Dom     | Sub | Dom      | Sub  | Dom     | Sub | Dom       | Sub | Dom          | Sub |
| Corry    | 5             | 0/1      | 0/4  | 0/1     | 0/4 | 0/1      | 0/4  | 0/1     | 0/4 | 0/1       | 0/4 | 0/1          | 0/4 |
| Dorien   | 5             | 1/2      | 0/3  | 0/2     | 0/3 | 0/2      | 0/2* | 0/2     | 0/3 | 0/2       | 0/3 | 0/2          | 0/3 |
| Fraukje  | 4             | 1/3      | 0/1  | 1/3     | 0/1 | 2/3      | 0/1  | 1/3     | 0/1 | 0/3       | 0/1 | 1/3          | 0/1 |
| Frodo    | 4             | 0/4      | —    | 0/4     | —   | 1/4      | —    | 1/4     | —   | 0/4       | —   | 0/4          | —   |
| Lome     | 5             | 1/1      | 2/4  | 1/1     | 3/4 | 1/1      | 0/4  | 1/1     | 4/4 | 0/1       | 0/4 | 0/1          | 1/4 |
| Natascha | 5             | 2/3      | 0/1* | 0/3     | 0/2 | 0/3      | 0/2  | 0/3     | 0/2 | 0/3       | 0/2 | 0/3          | 0/2 |
| Patrick  | 5             | 2/3      | 0/2  | 2/3     | 1/2 | 2/3      | 1/2  | 0/3     | 1/2 | 1/3       | 1/2 | 1/3          | 0/2 |
| Pia      | 5             | 0/1      | 0/4  | 0/1     | 0/4 | 0/1      | 0/3* | 0/1     | 0/4 | 0/1       | 0/4 | 0/1          | 0/4 |
| Riet     | 5             | 2/2*     | 0/2  | 0/3     | 0/2 | 0/3      | 0/2  | 1/3     | 0/2 | 1/3       | 0/2 | 1/3          | 0/2 |
| Robert   | 4             | 0/4      | —    | 0/4     | —   | 1/4      | —    | 0/4     | —   | 0/4       | —   | 1/4          | —   |
| Sandra   | 5             | 2/3      | 1/2  | 0/3     | 0/2 | 0/3      | 0/2  | 1/3     | 0/2 | 0/3       | 0/2 | 0/3          | 0/2 |
| Tai      | 4             | —        | 1/4  | —       | 2/4 | —        | 3/3* | —       | 3/4 | —         | 1/4 | —            | 0/4 |
| Ulla     | 4             | 2/2      | 0/2  | 1/2     | 2/2 | 0/2      | 0/2  | 0/2     | 0/2 | 0/2       | 0/2 | 0/2          | 0/2 |

The number of groups the actor was tested in is also shown. The number before the slash is the number of trials in which the actor collapsed the trapdoor, and the number after the slash is the total number of trials for each condition. Dom, dominant; Sub, subordinate. \*Indicates that there was one trial in which there was no theft (i.e., the individual in the thief's position did not pull food away from the actor); these cases were not included in the analysis, therefore the number of trials do not add up to the full complement. Dashes (—) indicate no data, namely that due to rank position, the subject was either never in the subordinate role (Frodo and Robert) or in the dominant role (Tai).

**Table S7. Sex, age, and rearing histories of the chimpanzees tested**

| Name     | Sex    | Age (y) | Rearing history |
|----------|--------|---------|-----------------|
| Corry    | Female | 31      | Nursery         |
| Dorien   | Female | 28      | Nursery         |
| Fraukje  | Female | 32      | Nursery         |
| Frodo    | Male   | 14      | Mother          |
| Lome     | Male   | 7       | Mother          |
| Natascha | Female | 28      | Nursery         |
| Patrick  | Male   | 11      | Mother          |
| Pia      | Female | 9       | Mother          |
| Riet     | Female | 30      | Nursery         |
| Robert   | Male   | 32      | Nursery         |
| Sandra   | Female | 15      | Mother          |
| Tai      | Female | 6       | Mother          |
| Ulla     | Female | 31      | Nursery         |

**Table S8. Number of groups tested**

| Dominance/kinship | Dominant | Subordinate |
|-------------------|----------|-------------|
| Kin               | 15       | 15          |
| Nonkin            | 15       | 15          |

These groups are based on the actor's kinship with the victim and dominance to the thief.

**Table S9. Details of the 60 test groups**

| Actor    | Thief    | Victim   | Actor's dominance relationship with the thief | Actor's kin relationship to the victim | Test group         |
|----------|----------|----------|-----------------------------------------------|----------------------------------------|--------------------|
| Corry    | Frodo    | Patrick  | Subordinate                                   | Mother                                 | Subordinate/kin    |
| Corry    | Riet     | Patrick  | Subordinate                                   | Mother                                 | Subordinate/kin    |
| Corry    | Riet     | Ulla     | Subordinate                                   | None                                   | Subordinate/nonkin |
| Corry    | Sandra   | Lome     | Dominant                                      | Mother                                 | Dominant/kin       |
| Corry    | Robert   | Lome     | Subordinate                                   | Mother                                 | Subordinate/kin    |
| Dorien   | Robert   | Ulla     | Subordinate                                   | None                                   | Subordinate/nonkin |
| Dorien   | Lome     | Corry    | Dominant                                      | None                                   | Dominant/nonkin    |
| Dorien   | Riet     | Robert   | Subordinate                                   | None                                   | Subordinate/nonkin |
| Dorien   | Fraukje  | Patrick  | Dominant                                      | None                                   | Dominant/nonkin    |
| Dorien   | Frodo    | Corry    | Subordinate                                   | None                                   | Subordinate/nonkin |
| Fraukje  | Lome     | Frodo    | Dominant                                      | None                                   | Dominant/nonkin    |
| Fraukje  | Tai      | Pia      | Dominant                                      | Mother                                 | Dominant/kin       |
| Fraukje  | Sandra   | Pia      | Dominant                                      | Mother                                 | Dominant/kin       |
| Fraukje  | Frodo    | Pia      | Subordinate                                   | Mother                                 | Subordinate/kin    |
| Frodo    | Patrick  | Natascha | Dominant                                      | Infant                                 | Dominant/kin       |
| Frodo    | Ulla     | Patrick  | Dominant                                      | None                                   | Dominant/nonkin    |
| Frodo    | Corry    | Dorien   | Dominant                                      | None                                   | Dominant/nonkin    |
| Frodo    | Pia      | Riet     | Dominant                                      | None                                   | Dominant/nonkin    |
| Lome     | Dorien   | Corry    | Subordinate                                   | Infant                                 | Subordinate/kin    |
| Lome     | Fraukje  | Robert   | Subordinate                                   | None                                   | Subordinate/nonkin |
| Lome     | Tai      | Pia      | Dominant                                      | None                                   | Dominant/nonkin    |
| Lome     | Ulla     | Patrick  | Subordinate                                   | Full-sibling                           | Subordinate/kin    |
| Lome     | Patrick  | Natascha | Subordinate                                   | None                                   | Subordinate/nonkin |
| Natascha | Fraukje  | Frodo    | Dominant                                      | Mother                                 | Dominant/kin       |
| Natascha | Pia      | Dorien   | Dominant                                      | None                                   | Dominant/nonkin    |
| Natascha | Riet     | Frodo    | Subordinate                                   | Mother                                 | Subordinate/kin    |
| Natascha | Robert   | Corry    | Subordinate                                   | None                                   | Subordinate/nonkin |
| Natascha | Tai      | Frodo    | Dominant                                      | Mother                                 | Dominant/kin       |
| Patrick  | Fraukje  | Lome     | Dominant                                      | Full-sibling                           | Dominant/kin       |
| Patrick  | Sandra   | Corry    | Dominant                                      | Infant                                 | Dominant/kin       |
| Patrick  | Frodo    | Lome     | Subordinate                                   | Full-sibling                           | Subordinate/kin    |
| Patrick  | Frodo    | Corry    | Subordinate                                   | Infant                                 | Subordinate/kin    |
| Patrick  | Tai      | Lome     | Dominant                                      | Full-sibling                           | Dominant/kin       |
| Pia      | Natascha | Sandra   | Subordinate                                   | None                                   | Subordinate/nonkin |
| Pia      | Robert   | Fraukje  | Subordinate                                   | Infant                                 | Subordinate/kin    |
| Pia      | Patrick  | Fraukje  | Subordinate                                   | Infant                                 | Subordinate/kin    |
| Pia      | Corry    | Lome     | Subordinate                                   | None                                   | Subordinate/nonkin |
| Pia      | Tai      | Fraukje  | Dominant                                      | Infant                                 | Dominant/kin       |
| Riet     | Ulla     | Tai      | Dominant                                      | Mother                                 | Dominant/kin       |
| Riet     | Lome     | Sandra   | Dominant                                      | Mother                                 | Dominant/kin       |
| Riet     | Robert   | Dorien   | Subordinate                                   | None                                   | Subordinate/nonkin |
| Riet     | Patrick  | Frodo    | Subordinate                                   | None                                   | Subordinate/nonkin |
| Riet     | Dorien   | Sandra   | Dominant                                      | Mother                                 | Dominant/kin       |
| Robert   | Dorien   | Tai      | Dominant                                      | None                                   | Dominant/nonkin    |
| Robert   | Sandra   | Ulla     | Dominant                                      | None                                   | Dominant/nonkin    |
| Robert   | Corry    | Sandra   | Dominant                                      | None                                   | Dominant/nonkin    |
| Robert   | Patrick  | Riet     | Dominant                                      | None                                   | Dominant/nonkin    |
| Sandra   | Tai      | Robert   | Dominant                                      | None                                   | Dominant/nonkin    |
| Sandra   | Natascha | Lome     | Subordinate                                   | None                                   | Subordinate/nonkin |
| Sandra   | Lome     | Riet     | Dominant                                      | Infant                                 | Dominant/kin       |
| Sandra   | Pia      | Tai      | Dominant                                      | Full-sibling                           | Dominant/kin       |
| Sandra   | Frodo    | Tai      | Subordinate                                   | Full-sibling                           | Subordinate/kin    |
| Tai      | Pia      | Lome     | Subordinate                                   | None                                   | Subordinate/nonkin |
| Tai      | Frodo    | Riet     | Subordinate                                   | Infant                                 | Subordinate/kin    |
| Tai      | Lome     | Sandra   | Subordinate                                   | Infant                                 | Subordinate/kin    |
| Tai      | Natascha | Riet     | Subordinate                                   | Infant                                 | Subordinate/kin    |
| Ulla     | Pia      | Dorien   | Dominant                                      | None                                   | Dominant/nonkin    |
| Ulla     | Frodo    | Natascha | Subordinate                                   | None                                   | Subordinate/nonkin |
| Ulla     | Riet     | Lome     | Subordinate                                   | None                                   | Subordinate/nonkin |
| Ulla     | Tai      | Fraukje  | Dominant                                      | None                                   | Dominant/nonkin    |

Actors, thieves (when present), and victims (when present) constitute the groups. The dominance relationships between actor and thief, as well as kinship between actor and victim are shown. These combinations resulted in four test groups (dominant/kin, subordinate/kin, dominant/nonkin, and subordinate/nonkin). Because of possible agonistic interactions, the two adult males, Frodo and Robert, could not be tested together.
